# Supplementary material for: A multifunctional protective layer filled with 2D anionic nanosheets enabling a dendrite-free zinc anode
Source: Royal Society of Chemistry journal article supplement (doi:10.1039/d3qi01981k), 2024-01-01
Supplement: d3qi01981k1.pdf [file d3qi01981k1.pdf]

## Supporting Information

### **Multifunctional protective layer filled with 2D anionic nanosheets enabling dendrite-free zinc anode**

Sangsang Liu,<sup>a,b</sup> Qin Yu,<sup>a,b</sup> Haitao Liu,<sup>a,b</sup> Wenlong Chen,<sup>a,b</sup> Fugang Qi,<sup>a,b,\*</sup>

Yilong Dai,<sup>a,b</sup> Yaru Liang,<sup>a,b,\*</sup> Weihong Lai,<sup>c,\*</sup> Xiaoping Ouyang<sup>a,b</sup>

<sup>a</sup> School of Materials Science and Engineering, Xiangtan University, Xiangtan 411105,

P. R. China

<sup>b</sup> Key Laboratory of Low Dimensional Materials and Application Technology of

Ministry of Education, Xiangtan University, Xiangtan 411105, P. R. China

<sup>c</sup> Institute for Superconducting and Electronic Materials, Australian Institute of

Innovative Materials, Innovation Campus, University of Wollongong, Wollongong,

NSW 2500, Australia

\*E-mail(Corresponding author): [yaruliang@xtu.edu.cn](mailto:yaruliang@xtu.edu.cn) (Yaru Liang)

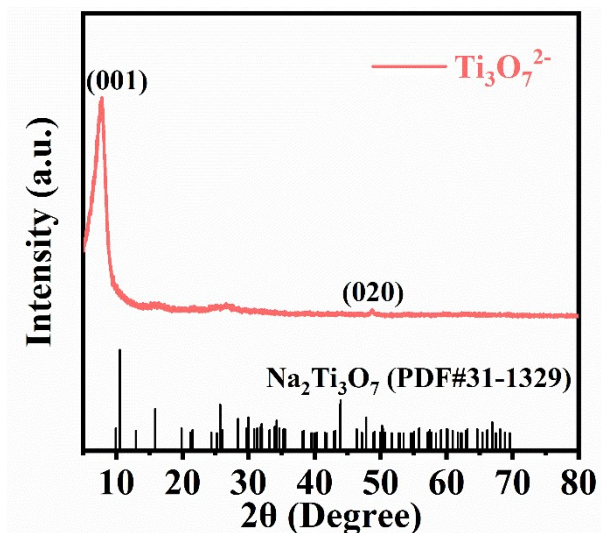

Fig. S1 XRD pattern of  $\text{Ti}_3\text{O}_7^{2-}$  nanosheets.

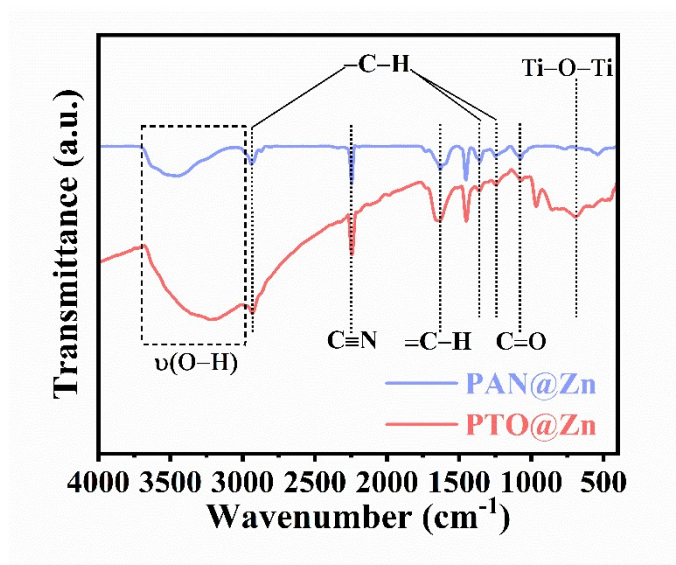

Fig. S2 FTIR spectrum of PAN@Zn and PTO@Zn.

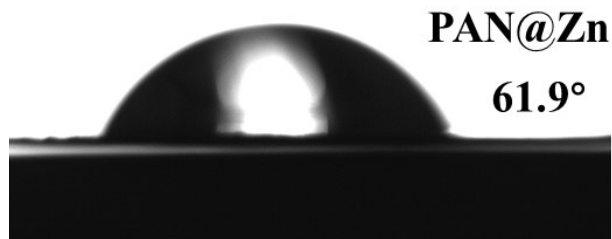

Fig. S3 Contact angles of PAN@Zn electrode.

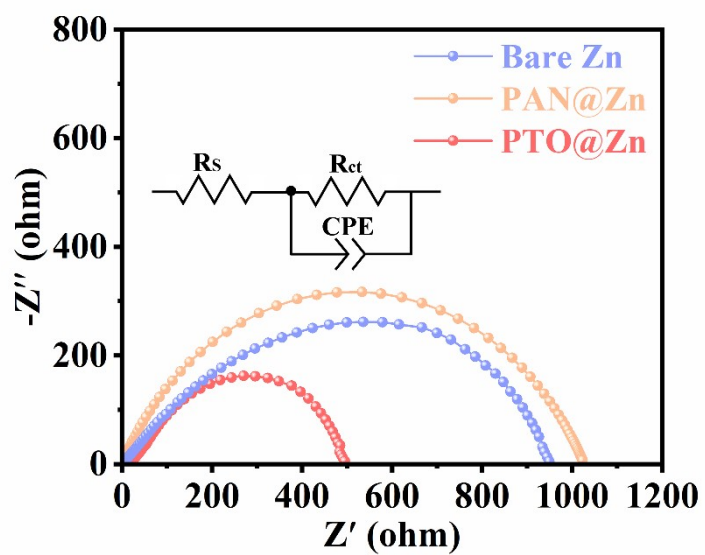

Fig. S4 EIS spectra of the bare Zn, PAN@Zn and PTO@Zn symmetric cells.

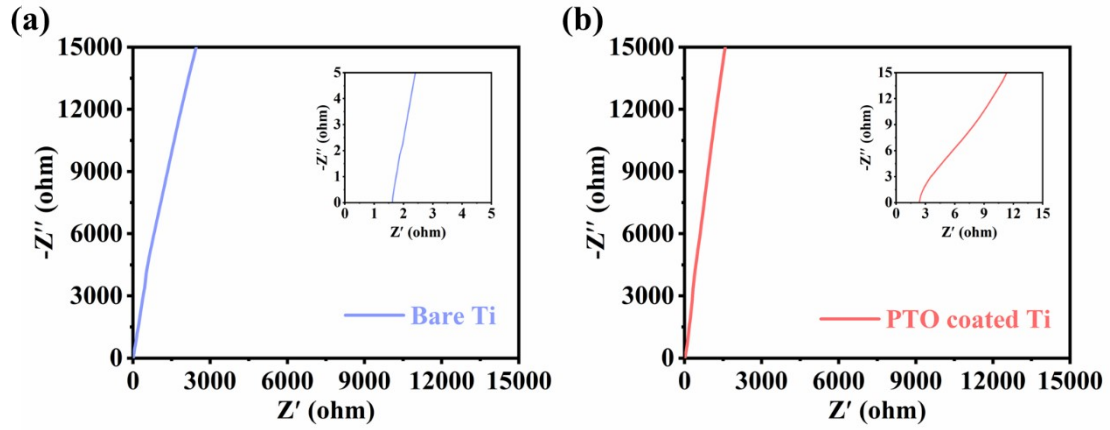

**Fig. S5** Nyquist plots over the frequency range of 100 kHz to 10 mHz of (a) the symmetrical cell with Ti as electrodes and (b) the symmetrical cell with PTO-coated Ti as electrodes (inset: enlargement of indicated range). The ionic conductivity ( $\sigma$ ) is calculated according to the following equation,

$$\sigma = \frac{L}{R_b \cdot S}$$

where L is the thickness of the PTO layer,  $R_b$  is the bulk impedance of the PTO layer, and S is the contact area.

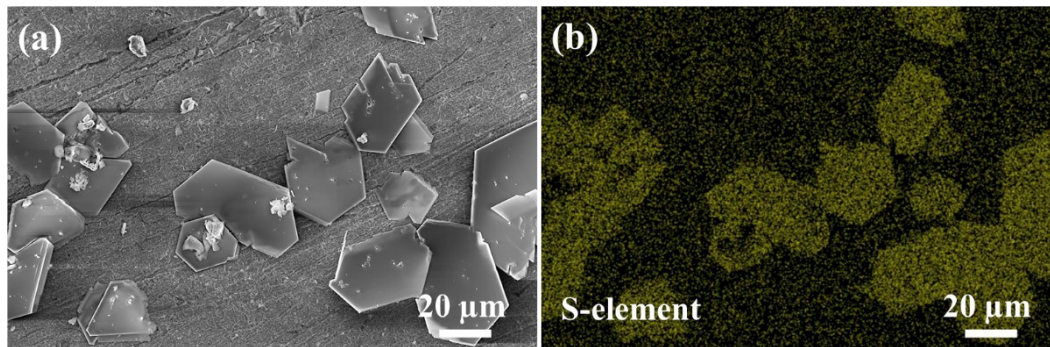

**Fig. S6** (a) SEM image and (b) corresponding EDS mapping of S element of the Zn foil after being soaked in 2 M  $ZnSO_4$  for 10 days.

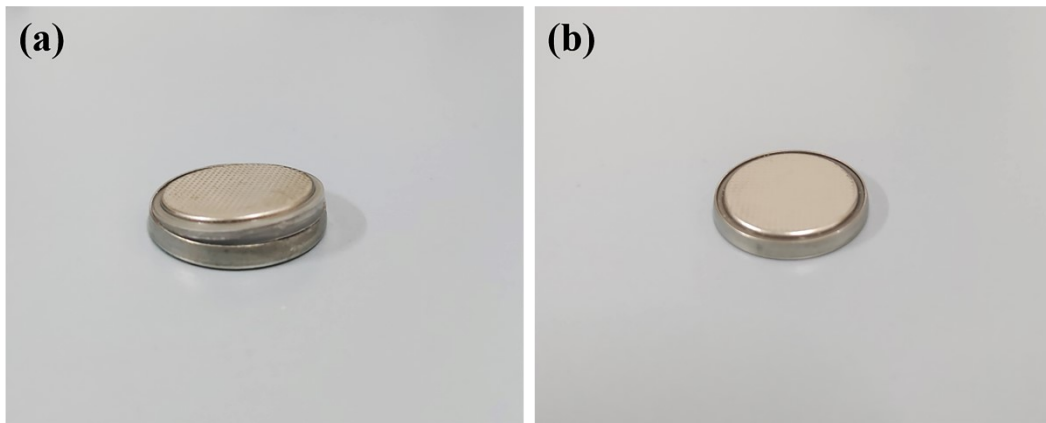

**Fig. S7** Photographs of (a) bare Zn and (b) PTO@Zn symmetrical battery after stripping/plating.

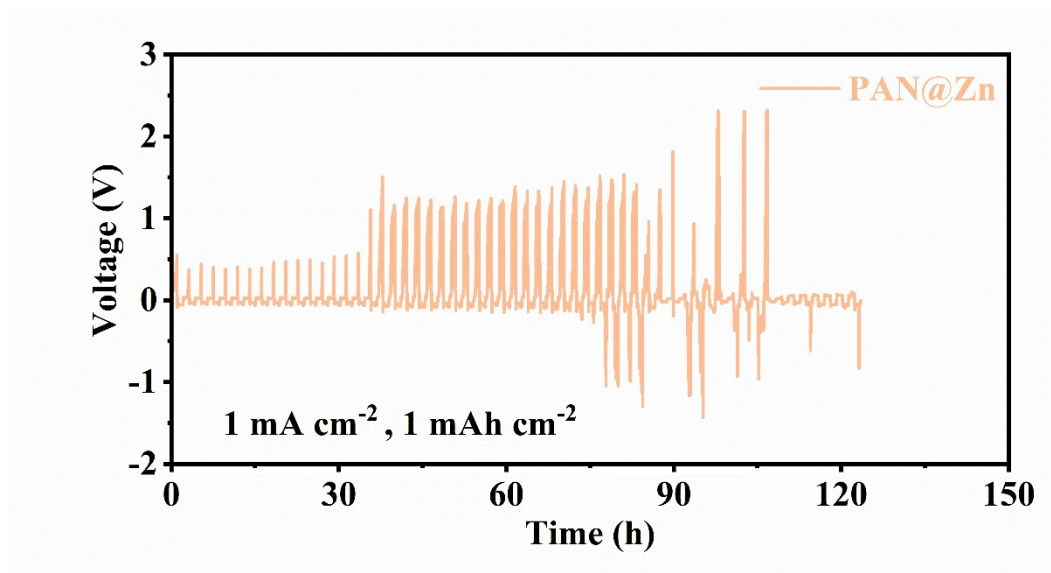

**Fig. S8** Cycling performance of symmetrical PAN@Zn||PAN@Zn cell at 1 mA cm<sup>-2</sup> with a capacity of 1 mAh cm<sup>-2</sup>.

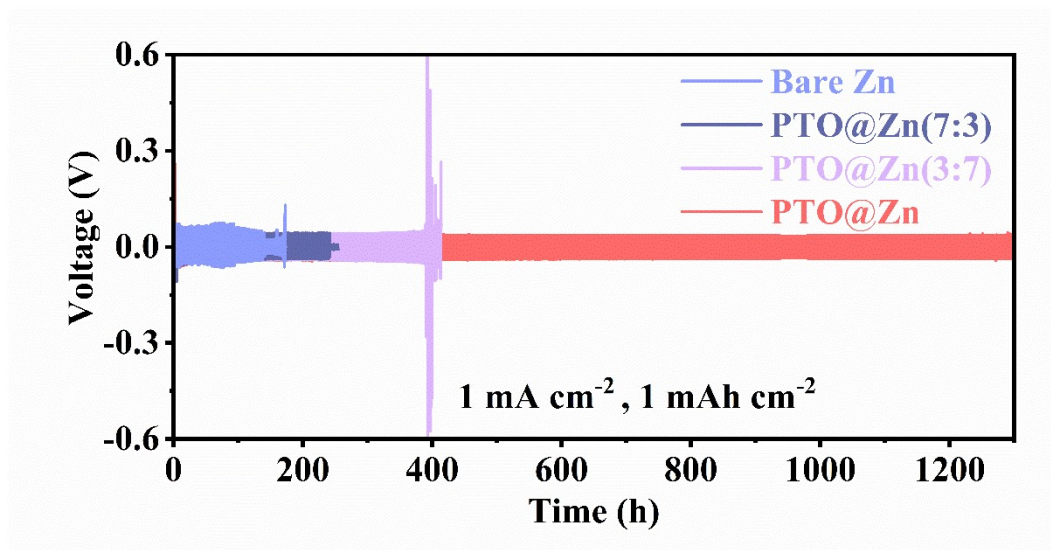

**Fig. S9** Cycling performance of symmetrical Zn||Zn and PTO@Zn||PTO@Zn cells at  $1 \text{ mA cm}^{-2}$  with a capacity of  $1 \text{ mAh cm}^{-2}$ . The PTO coating layers have different mass ratios of PTO and 2D  $\text{Ti}_3\text{O}_7^{2-}$  nanosheets. For the layers with  $m(\text{PAN}):m(\text{Ti}_3\text{O}_7^{2-})$  ratios of 1:1, 7:3 and 3:7, the electrodes are denoted as PTO@Zn, PTO@Zn(7:3), and PTO@Zn(3:7), respectively.

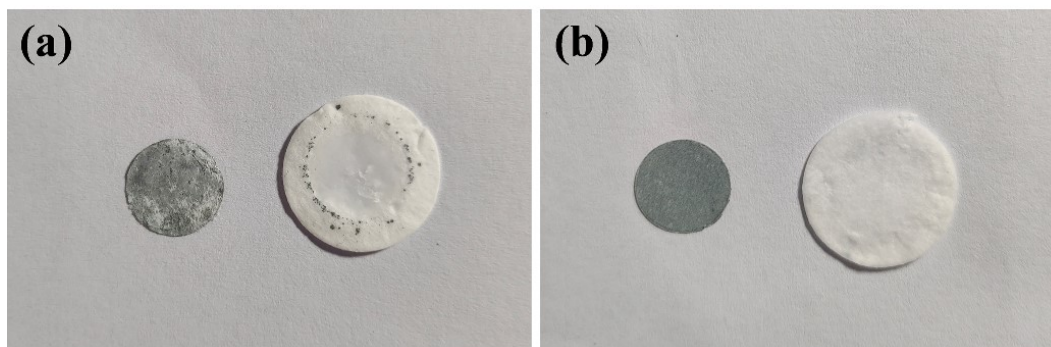

**Fig. S10** Digital images of the electrodes and separators disassembled from the (a) bare Zn and (b) PTO@Zn symmetric cells after 20 cycles at  $5 \text{ mA cm}^{-2}/5 \text{ mAh cm}^{-2}$ .



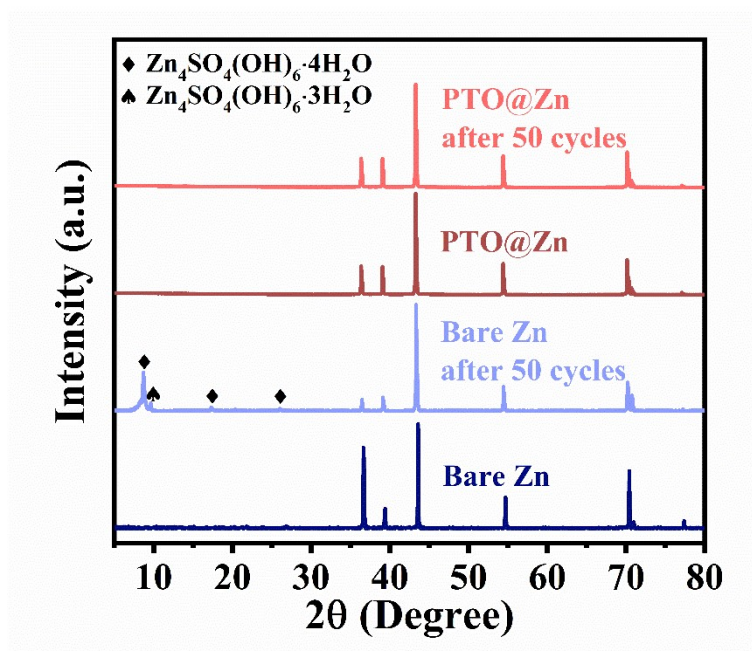

Fig. S11 The XRD patterns of the bare Zn and PTO@Zn before and after cycling.

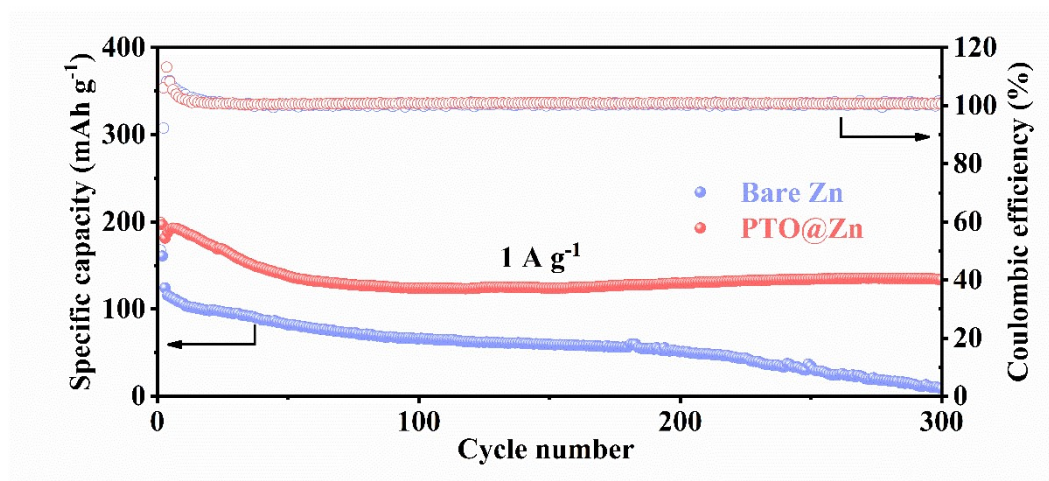

Fig. S12 Cycling performance of Zn|| $\text{MnO}_2$  and PTO@Zn|| $\text{MnO}_2$  cells under low N/P ratio cycled at  $1 \text{ A g}^{-1}$ .

**Table S1.** Comparison of cycling performance for this work with recently reported Zn-based Zn||MnO<sub>2</sub> full cells.

| Anode<br>(Thickness, $\mu\text{m}$ )               | Cathode<br>mass<br>loading<br>( $\text{mg cm}^{-2}$ ) | N/P<br>ratio | Current density                         | Specific<br>capacity<br>( $\text{mAh g}^{-1}$ ) | Reference |
|----------------------------------------------------|-------------------------------------------------------|--------------|-----------------------------------------|-------------------------------------------------|-----------|
| Zn <sub>0.73</sub> Al <sub>0.27</sub> @Zn<br>(200) | 2.0                                                   | ~63          | 1.2 C<br>(1C = 616 mA g <sup>-1</sup> ) | ~243                                            | 1         |
| Zn Sn<br>(20)                                      | 1.2                                                   | ~33          | 1 A g <sup>-1</sup>                     | 124                                             | 2         |
| Zn Sn<br>(250)                                     | 15.8                                                  | ~31          | 0.2 A g <sup>-1</sup>                   | 92                                              |           |
| Zn@MCFs<br>(100)                                   | 1.0                                                   | /            | 1 A g <sup>-1</sup>                     | 236.1                                           | 3         |
| AEC-Zn<br>(80)                                     | 1.0                                                   | /            | 2 C<br>(1 C=308 mA g <sup>-1</sup> )    | 244                                             | 4         |
| Cu@Zn<br>(40)                                      | 1.5                                                   | /            | 1 A g <sup>-1</sup>                     | ~120                                            | 5         |
| PA-Zn<br>(20)                                      | ~1.3                                                  | /            | 2 C<br>(1 C=300 mA g <sup>-1</sup> )    | 176.1                                           | 6         |
|                                                    | ~15                                                   | /            |                                         | 175                                             |           |
| ZnS@Zn<br>(10)                                     | ~0.8                                                  | /            | 5 C<br>(1 C=308 mA g <sup>-1</sup> )    | 125.8                                           | 7         |
| Zn-VSGDY<br>(10)                                   | 1.3-2.6                                               | /            | 1 A g <sup>-1</sup>                     | 125.4                                           | 8         |
| PTO@Zn<br>(30)                                     | 1.0-1.2                                               | ~47          | 1 A g <sup>-1</sup>                     | 198.6                                           | This work |
| PTO@Zn<br>(10)                                     | ~2.1                                                  | ~9           |                                         | 196.8                                           |           |



## Reference

- 1 J. Zheng, Z. Huang, Y. Zeng, W. Liu, B. Wei, Z. Qi, Z. Wang, C. Xia and H. Liang, Electrostatic Shielding Regulation of Magnetron Sputtered Al-Based Alloy Protective Coatings Enables Highly Reversible Zinc Anodes, *Nano Lett.*, 2022, **22**, 1017–1023.
- 2 P. Xiong, Y. Kang, H. Yuan, Q. Liu, S. H. Baek, J. M. Park, Q. Dou, X. Han, W.-S. Jang, S. J. Kwon, Y.-M. Kim, W. Li and H. S. Park, Galvanically replaced artificial interfacial layer for highly reversible zinc metal anodes, *Appl. Phys. Rev.*, 2022, **9**, 011401.
- 3 H. Ying, P. Huang, Z. Zhang, S. Zhang, Q. Han, Z. Zhang, J. Wang and W. Q. Han, Freestanding and Flexible Interfacial Layer Enables Bottom-Up Zn Deposition Toward Dendrite-Free Aqueous Zn-Ion Batteries, *Nano-Micro Lett.*, 2022, **14**, 180.
- 4 R. Zhao, Y. Yang, G. Liu, R. Zhu, J. Huang, Z. Chen, Z. Gao, X. Chen and L. Qie, Redirected Zn Electrodeposition by an Anti-Corrosion Elastic Constraint for Highly Reversible Zn Anodes, *Adv. Funct. Mater.*, 2020, **31**, 2001867.
- 5 Y. Zhang, G. Wang, F. Yu, G. Xu, Z. Li, M. Zhu, Z. Yue, M. Wu, H.-K. Liu, S.-X. Dou and C. Wu, Highly reversible and dendrite-free Zn electrodeposition enabled by a thin metallic interfacial layer in aqueous batteries, *Chem Eng J*, 2021, **416**, 128062.
- 6 Z. Zhao, J. Zhao, Z. Hu, J. Li, J. Li, Y. Zhang, C. Wang and G. Cui, Long-life and deeply rechargeable aqueous Zn anodes enabled by a multifunctional brightener-inspired interphase, *Energy Environ. Sci.*, 2019, **12**, 1938-1949.
- 7 J. Hao, B. Li, X. Li, X. Zeng, S. Zhang, F. Yang, S. Liu, D. Li, C. Wu and Z. Guo, An In-Depth Study of Zn Metal Surface Chemistry for Advanced Aqueous Zn-Ion Batteries, *Adv Mater*, 2020, **32**, e2003021.
- 8 X. Liu, K. Wang, Y. Liu, F. Zhao, J. He, H. Wu, J. Wu, H. P. Liang and C. Huang, Constructing an ion-oriented channel on a zinc electrode through surface engineering, *Carbon Energy*, 2023, e343.
